# Supplementary material for: Planktonic foraminiferal assemblages as tracers of paleoceanographic changes within the northern Benguela current system since the Early Pleistocene
Source: Copernicus journal article supplement (doi:10.5194/cp-20-2237-2024), 2024-10-09
Supplement: Supplementary file 1 [file cp-20-2237-2024-supplement.zip]

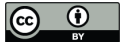

## *Supplement of*

# **Planktonic foraminiferal assemblages as tracers of paleoceanographic changes within the northern Benguela current system since the Early Pleistocene**

**Arianna V. Del Gaudio et al.**

*Correspondence to:* Arianna V. Del Gaudio ([arianna.del-gaudio@uni-graz.at](mailto:arianna.del-gaudio@uni-graz.at))

- [cp-20-2237-2024-supplement-title-page.pdf](#)
- [Fig S1.tif](#)
- [Fig S2.tif](#)
- [Supplementary\\_Material\\_Captions\\_Del\\_Gaudio.docx](#)
- [Table S1.xlsx](#)
- [Table S2.xlsx](#)
- [Table S3.xlsx](#)
- [Table S4.xlsx](#)
- [Table S5.xlsx](#)

The copyright of individual parts of the supplement might differ from the article licence.
