# Supplementary material for: Planktonic foraminiferal assemblages as tracers of paleoceanographic changes within the northern Benguela current system since the Early Pleistocene
Source: Copernicus journal article supplement (doi:10.5194/cp-20-2237-2024), 2024-10-09
Supplement: Supplementary file 1 [file cp-20-2237-2024-supplement.zip]

## Sheet: percentages_asin transf
Expedition	Site/Hole	Core	Section	Interval	Average depth (mbsf)	Beella digitata	Dentigloborotalia anfracta	Globigerina bulloides	Globigerina falconensis	Globigerinella adamsi	Globigerinella calida	Globigerinella siphonifera	Globigerinita glutinata	Globigerinita uvula	Globigerinoides conglobatus	Globigerinoides obliquus	Globigerinoides ruber (white)	Globigerinoides ruber (pink)	Globigerinoides tenellus	Globoconella inflata	Globorotalia crassaformis	Globorotalia cf. crassaformis	Globorotalia eastropacia	Globorotalia flexuosa	Globorotalia hessi	Globorotalia hirsuta	Globorotalia menardii	Globorotalia ronda	Globorotalia scitula	Globorotalia viola	Globorotalia tosaensis	Globorotalia truncatulinoides (dx)	Globorotalia truncatulinoides (sx)	Globorotalia tumida	Globorotalia ungulata	Globoturborotalita rubescens	Globoturborotalita spp.	Hastigerina pelagica	Neogloboquadrina dutertrei	Neogloboquadrina incompta	Neogloboquadrina pachyderma	Orbulina suturalis	Orbulina universa	Pulleniatina finalis	Pulleniatina obliquiloculata	Sphaeroidinella dehiscens	Tenuitellita iota	Tenuitellita parkerae	Trilobatus spp.
391	U1575A	1R	1W	0-2	0.01			29	2		3	3	14	1	1		9	1		51	16						46		3			29	15			5			3	40	3	1	24	1		2			11
391	U1575A	1R	1W	140-142	1.41			22	2			4	13				13			59	11			1			75		2			18	25			6			6	24	15		19			2			2
391	U1575A	1R	2W	0-2	1.52			20	1			4	5	1	1		15		3	73	11			3	2		69		1			27	4			5			7	23	28		6	1	2				3
391	U1575A	1R	3W	138-140	4.41			13				1	11	1	1		7		4	62	60				4		7		2	2		9	44			6			2	69	3		9			5			1
391	U1575A	1R	4W	10-12	4.64			21				1	9	2	1		6			74	58	1			1		9		2	2		10	40			1			2	51	7		8		1	2	3		0
391	U1575A	1R	5W	0-2	6.04			26	4			1	11	2	5		13			69	57				9		4					11	13			4			13	36	10		13			6			0
391	U1575A	1R	6W	0-2	7.55			10	2			2	15	2	1		10			132	28				3		3		3			12	5			5			3	36	12		5			4			3
391	U1575A	1R	7W	69-71	9.24			21				6	8				16			55	48				1		13					29	4			4			3	47	12		8			21			5
391	U1575A	2R	1W	0-2	9.51			19					8				21			60	84						18		2			23	6			3				41	8	1	7		4	3			0
391	U1575A	2R	2W	143-145	12.44			25				8	7	4			26		4	36	40				4		1	33	3		7	5	24			3				36	6		4		14	3	2		4
391	U1575A	2R	3W	0-2	12.52			26				3	14	1			19		1	41	46						1	24		2	3	5	38			5			1	34	4		6		16	3			3
391	U1575A	2R	4W	0-2	14.03			23					6				17			79	45				7		11	2	1			2	21			1			1	48	6		17	3	3				3
391	U1575A	2R	5W	0-2	15.54			36					5				9			113	21						22	4	1				3			1			3	59	9		5		4	5	1		4
391	U1575A	2R	7W	64-66	18.99			20				2	12		2		20			88	49				13		2	2	3	1	1		10			3			4	32	2		3	1	4	8			0
391	U1575A	3R	1W	0-2	19.01			27				2	7				10			100	34		1		2		13	1			1		9			3			2	47	11		7		4				1
391	U1575A	3R	2W	0-2	20.51			23				7	6				14			83	50		9						2		1	1	23			2			1	30	12		9		3				0
391	U1575A	3R	3W	145-147	23.45			27				2	4	6	3		25			80	42						27	17	1		1	1	13			3				27	4	1	7			1			0
391	U1575A	3R	4W	138-140	24.89			19					9	2			17			119	41						9	3	1		1	16	3			4			1	53	2		6			2			3
391	U1575A	3R	5W	0-2	25.02			16				3	14	4			14			140	19						5	7				20	2		1	4			1	39	8		2			2			3
391	U1575A	3R	6W	120-122	27.72			23				1	9	3	1		8			67	40						10	11	3		1	26	8			3			4	40	14	1	11		2	4			0
391	U1575A	3R	7W	65-67	28.48			29				2	5	5	3		14		1	62	50						3	6	2		3	28	17						1	39	4		15	2	2	4			2
391	U1575A	4R	1W	0-2	28.71			27				2	2	1			20			73	42		10					8	3		2		33			6				29	16	1	10	1	3	1	1		1
391	U1575A	4R	2W	138-140	31.6			20				3	4	4			14			82	24		11				1	2					42			3			4	33	18		38		1				0
[truncated: 125 more columns]

## Sheet: simper 1a-1b
		Taxon	Av. dissim	Contrib. %	Cumulative %	Mean 1a	Mean 1b
		G. truncatulinoides (dx)	3.393	21.48	21.48	0.248	0.0571
		G. menardii	2.062	13.06	34.54	0.167	0.0941
		G. truncatulinoides (sx)	1.957	12.39	46.93	0.23	0.29
		G. inflata	1.498	9.484	56.41	0.474	0.504
		G. ruber	1.182	7.485	63.9	0.196	0.257
		G. crassaformis	1.135	7.189	71.09	0.441	0.385
		O. universa	1.094	6.927	78.01	0.181	0.184
		N. incompta	1.062	6.727	84.74	0.395	0.342
		N. pachyderma	1.03	6.521	91.26	0.161	0.16
		G. glutinata	0.7991	5.059	96.32	0.168	0.147
		G. bulloides	0.5808	3.678	100	0.268	0.287
												Distance/similarity measurement = Bray-Curtis
												Overal average dissimilarity = 15.79

## Sheet: simper 1-2
	Taxon	Av. dissim	Contrib. %	Cumulative %	Mean 1	Mean 2
	G. inflata	3.511	19.43	19.43	0.49	0.685
	G. truncatulinoides (sx)	2.667	14.76	34.19	0.262	0.117
	G. truncatulinoides (dx)	2.353	13.02	47.22	0.146	0.138
	G. crassaformis	1.897	10.5	57.71	0.411	0.31
	G. menardii	1.733	9.591	67.3	0.128	0.177
	O. universa	1.122	6.211	73.51	0.183	0.127
	G. bulloides	1.03	5.7	79.21	0.278	0.265							Distance/similarity measurement = Bray-Curtis
	N. incompta	1.022	5.655	84.87	0.366	0.404
	N. pachyderma	0.9936	5.499	90.37	0.16	0.163							Overal average dissimilarity = 18.07
	G. ruber	0.9218	5.102	95.47	0.228	0.199
	G. glutinata	0.8185	4.53	100	0.157	0.18

## Sheet: simper 2-3
			Taxon	Av. dissim	Contrib. %	Cumulative %	Mean 2	Mean 3
			G. menardii	4.925	22.17	22.17	0.177	0.461
			G. inflata	4.04	18.18	40.36	0.685	0.453
			G. truncatulinoides (dx)	2.542	11.44	51.8	0.138	0.281
			G. crassaformis	1.909	8.593	60.39	0.31	0.2
			N. incompta	1.741	7.836	68.23	0.404	0.305
			G. truncatulinoides (sx)	1.709	7.694	75.92	0.117	0.205
			O. universa	1.673	7.532	83.45	0.127	0.221
			N. pachyderma	1.547	6.964	90.42	0.163	0.206
			G. bulloides	0.9518	4.285	94.7	0.265	0.276							Distance/similarity measurement = Bray-Curtis
			G. glutinata	0.7669	3.452	98.16	0.18	0.18
			G. ruber	0.4097	1.844	100	0.199	0.2							Overal average dissimilarity = 22.21

## Sheet: simper 1-3
		Taxon	Av. dissim	Contrib. %	Cumulative %	Mean 1	Mean 3
		G. menardii	5.764	27.05	27.05	0.128	0.461
		G. crassaformis	3.633	17.05	44.1	0.411	0.2
		G. truncatulinoides (dx)	2.579	12.1	56.2	0.146	0.281
		G. truncatulinoides (sx)	1.775	8.329	64.53	0.262	0.205
		N. pachyderma	1.557	7.304	71.83	0.16	0.206
		O. universa	1.373	6.442	78.27	0.183	0.221
		N. incompta	1.247	5.852	84.12	0.366	0.305
		G. inflata	1.199	5.625	89.75	0.49	0.453
		G. ruber	0.8455	3.967	93.72	0.228	0.2
		G. glutinata	0.8348	3.917	97.63	0.157	0.18							Distance/similarity measurement = Bray-Curtis
		G. bulloides	0.5044	2.367	100	0.278	0.276
														Overal average dissimilarity = 21.31

## Sheet: G_ruber_sum
		Globigerinoides ruber s.l.	Globigerinoides ruber s.s.	TOTAL
		4	5	9
		7	6	13
		9	6	15
		4	3	7
		3	3	6
		10	3	13
		7	3	10
		11	5	16
		12	9	21
		20	6	26
		17	2	19
		13	4	17
		8	1	9
		11	9	20
		6	4	10
		13	1	14
		20	5	25
		11	6	17
		14		14
		6	2	8
		8	6	14
		13	7	20
		11	3	14

## Sheet: Trilobatus spp_sum
		Trilobatus immaturus	Trilobatus quadrilobatus	Trilobatus trilobus	Trilobatus sacculifer	TOTAL
		8			3	11
		1			1	2
		1	1	1		3
		1				1
						0
						0
		1	1	1		3
		4			1	5
						0
		2			2	4
		2			1	3
			1	1	1	3
		1	2		1	4
						0
			1			1
						0
						0
		1			2	3
		1			2	3
						0
		1			1	2
		1				1
						0

## Sheet: G_truca_ratio
			% Globorotalia truncatulinoides (dx)	% Globorotalia truncatulinoides (sx)	Ratio (G.trunca dx/G.trunca sx)-1	Sample depth (mbsf)
			9.20635	4.7619	0.933333	0.01
			5.625	7.8125	-0.28	1.41
			8.49057	1.25786	5.75	1.52
			2.75229	13.4557	-0.795455	4.41
			3.20513	12.8205	-0.75	4.64
			3.58306	4.23453	-0.153846	6.04
			4.05405	1.68919	1.4	7.55
			9.57096	1.32013	6.25	9.24
			7.46753	1.94805	2.83333	9.51
			1.65017	7.92079	-0.791667	12.44
			1.67224	12.709	-0.868421	12.52
			0.660066	6.93069	-0.904762	14.03
			0	0.983607	-1	15.54
			0	3.50877	-1	18.99
			0	3.13589	-1	19.01
			0.353357	8.12721	-0.956522	20.51
			0.334448	4.34783	-0.923077	23.45
			5.11182	0.958466	4.33333	24.89
			6.55738	0.655738	9	25.02
			8.75421	2.6936	2.25	27.72
			9.27152	5.62914	0.647059	28.48
			0	11.0368	-1	28.71
			0	13.5484	-1	31.6

## Sheet: ALE Index
Expedition	Site/Hole	Core	Section	Interval	Average depth (mbsf)	Beella digitata	Dentigloborotalia anfracta	Globigerina bulloides	Globigerina falconensis	Globigerinella adamsi	Globigerinella calida	Globigerinella siphonifera	Globigerinita glutinata	Globigerinita uvula	Globigerinoides conglobatus	Globigerinoides obliquus	Globigerinoides ruber	Globigerinoides ruber (pink)	Globigerinoides tenellus	Globoconella inflata	Globorotalia crassaformis	Globorotalia cf. crassaformis	Globorotalia eastropacia	Globorotalia flexuosa	Globorotalia hessi	Globorotalia hirsuta	Globorotalia menardii	Globorotalia ronda	Globorotalia scitula	Globorotalia viola	Globorotalia tosaensis	Globorotalia truncatulinoides (dx)	Globorotalia truncatulinoides (sx)	Globorotalia tumida	Globorotalia ungulata	Globoturborotalita rubescens	Globoturborotalita spp.	Hastigerina pelagica	Neogloboquadrina dutertrei	Neogloboquadrina incompta	Neogloboquadrina pachyderma	Orbulina suturalis	Orbulina universa	Pulleniatina finalis	Pulleniatina obliquiloculata	Sphaeroidinella dehiscens	Tenuitellita iota	Tenuitellita parkerae	Trilobatus spp.
391	U1575A	1R	1W	0-2	0.01	0	0	9.20635	0.634921	0	0.952381	0.952381	4.44444	0.31746	0.31746	0	2.85714	0.31746	0	16.1905	5.07937	0	0	0	0	0	14.6032	0	0.952381	0	0	9.20635	4.7619	0	0	1.5873	0	0	0.952381	12.6984	0.952381	0.31746	7.61905	0.31746	0	0.634921	0	0	3.49206
391	U1575A	1R	1W	140-142	1.41	0	0	6.875	0.625	0	0	1.25	4.0625	0	0	0	4.0625	0	0	18.4375	3.4375	0	0	0.3125	0	0	23.4375	0	0.625	0	0	5.625	7.8125	0	0	1.875	0	0	1.875	7.5	4.6875	0	5.9375	0	0	0.625	0	0	0.625
391	U1575A	1R	2W	0-2	1.52	0	0	6.28931	0.314465	0	0	1.25786	1.57233	0.314465	0.314465	0	4.71698	0	0.943396	22.956	3.45912	0	0	0.943396	0.628931	0	21.6981	0	0.314465	0	0	8.49057	1.25786	0	0	1.57233	0	0	2.20126	7.2327	8.80503	0	1.88679	0.314465	0.628931	0	0	0	0.943396
391	U1575A	1R	3W	138-140	4.41	0	0	3.97554	0	0	0	0.30581	3.36391	0.30581	0.30581	0	2.14067	0	1.22324	18.9602	18.3486	0	0	0	1.22324	0	2.14067	0	0.611621	0.611621	0	2.75229	13.4557	0	0	1.83486	0	0	0.611621	21.1009	0.917431	0	2.75229	0	0	1.52905	0	0	0.30581
391	U1575A	1R	4W	10-12	4.64	0	0	6.73077	0	0	0	0.320513	2.88462	0.641026	0.320513	0	1.92308	0	0	23.7179	18.5897	0.320513	0	0	0.320513	0	2.88462	0	0.641026	0.641026	0	3.20513	12.8205	0	0	0.320513	0	0	0.641026	16.3462	2.24359	0	2.5641	0	0.320513	0.641026	0.961538	0	0
391	U1575A	1R	5W	0-2	6.04	0	0	8.46906	1.30293	0	0	0.325733	3.58306	0.651466	1.62866	0	4.23453	0	0	22.4756	18.5668	0	0	0	2.9316	0	1.30293	0	0	0	0	3.58306	4.23453	0	0	1.30293	0	0	4.23453	11.7264	3.25733	0	4.23453	0	0	1.9544	0	0	0
391	U1575A	1R	6W	0-2	7.55	0	0	3.37838	0.675676	0	0	0.675676	5.06757	0.675676	0.337838	0	3.37838	0	0	44.5946	9.45946	0	0	0	1.01351	0	1.01351	0	1.01351	0	0	4.05405	1.68919	0	0	1.68919	0	0	1.01351	12.1622	4.05405	0	1.68919	0	0	1.35135	0	0	1.01351
391	U1575A	1R	7W	69-71	9.24	0	0	6.93069	0	0	0	1.9802	2.64026	0	0	0	5.28053	0	0	18.1518	15.8416	0	0	0	0.330033	0	4.29043	0	0	0	0	9.57096	1.32013	0	0	1.32013	0	0	0.990099	15.5116	3.9604	0	2.64026	0	0	6.93069	0	0	1.65017
391	U1575A	2R	1W	0-2	9.51	0	0	6.16883	0	0	0	0	2.5974	0	0	0	6.81818	0	0	19.4805	27.2727	0	0	0	0	0	5.84416	0	0.649351	0	0	7.46753	1.94805	0	0	0.974026	0	0	0	13.3117	2.5974	0.324675	2.27273	0	1.2987	0.974026	0	0	0
391	U1575A	2R	2W	143-145	12.44	0	0	8.25083	0	0	0	2.64026	2.31023	1.32013	0	0	8.58086	0	1.32013	11.8812	13.2013	0	0	0	1.32013	0	0.330033	10.8911	0.990099	0	2.31023	1.65017	7.92079	0	0	0.990099	0	0	0	11.8812	1.9802	0	1.32013	0	4.62046	0.990099	0.660066	0	1.32013
391	U1575A	2R	3W	0-2	12.52	0	0	8.69565	0	0	0	1.00334	4.68227	0.334448	0	0	6.35452	0	0.334448	13.7124	15.3846	0	0	0	0	0	0.334448	8.02676	0	0.668896	1.00334	1.67224	12.709	0	0	1.67224	0	0	0.334448	11.3712	1.33779	0	2.00669	0	5.35117	1.00334	0	0	1.00334
391	U1575A	2R	4W	0-2	14.03	0	0	7.59076	0	0	0	0	1.9802	0	0	0	5.61056	0	0	26.0726	14.8515	0	0	0	2.31023	0	3.63036	0.660066	0.330033	0	0	0.660066	6.93069	0	0	0.330033	0	0	0.330033	15.8416	1.9802	0	5.61056	0.990099	0.990099	0	0	0	0.990099
391	U1575A	2R	5W	0-2	15.54	0	0	11.8033	0	0	0	0	1.63934	0	0	0	2.95082	0	0	37.0492	6.88525	0	0	0	0	0	7.21311	1.31148	0.327869	0	0	0	0.983607	0	0	0.327869	0	0	0.983607	19.3443	2.95082	0	1.63934	0	1.31148	1.63934	0.327869	0	1.31148
391	U1575A	2R	7W	64-66	18.99	0	0	7.01754	0	0	0	0.701754	4.21053	0	0.701754	0	7.01754	0	0	30.8772	17.193	0	0	0	4.5614	0	0.701754	0.701754	1.05263	0.350877	0.350877	0	3.50877	0	0	1.05263	0	0	1.40351	11.2281	0.701754	0	1.05263	0.350877	1.40351	2.80702	0	0	0
391	U1575A	3R	1W	0-2	19.01	0	0	9.40767	0	0	0	0.696864	2.43902	0	0	0	3.48432	0	0	34.8432	11.8467	0	0.348432	0	0.696864	0	4.52962	0.348432	0	0	0.348432	0	3.13589	0	0	1.0453	0	0	0.696864	16.3763	3.83275	0	2.43902	0	1.39373	0	0	0	0.348432
391	U1575A	3R	2W	0-2	20.51	0	0	8.12721	0	0	0	2.4735	2.12014	0	0	0	4.947	0	0	29.3286	17.6678	0	3.18021	0	0	0	0	0	0.706714	0	0.353357	0.353357	8.12721	0	0	0.706714	0	0	0.353357	10.6007	4.24028	0	3.18021	0	1.06007	0	0	0	0
391	U1575A	3R	3W	145-147	23.45	0	0	9.0301	0	0	0	0.668896	1.33779	2.00669	1.00334	0	8.3612	0	0	26.7559	14.0468	0	0	0	0	0	9.0301	5.68562	0.334448	0	0.334448	0.334448	4.34783	0	0	1.00334	0	0	0	9.0301	1.33779	0.334448	2.34114	0	0	0.334448	0	0	0
391	U1575A	3R	4W	138-140	24.89	0	0	6.07029	0	0	0	0	2.8754	0.638978	0	0	5.43131	0	0	38.0192	13.099	0	0	0	0	0	2.8754	0.958466	0.319489	0	0.319489	5.11182	0.958466	0	0	1.27796	0	0	0.319489	16.9329	0.638978	0	1.91693	0	0	0.638978	0	0	0.958466
391	U1575A	3R	5W	0-2	25.02	0	0	5.2459	0	0	0	0.983607	4.59016	1.31148	0	0	4.59016	0	0	45.9016	6.22951	0	0	0	0	0	1.63934	2.29508	0	0	0	6.55738	0.655738	0	0.327869	1.31148	0	0	0.327869	12.7869	2.62295	0	0.655738	0	0	0.655738	0	0	0.983607
391	U1575A	3R	6W	120-122	27.72	0	0	7.74411	0	0	0	0.3367	3.0303	1.0101	0.3367	0	2.6936	0	0	22.5589	13.468	0	0	0	0	0	3.367	3.7037	1.0101	0	0.3367	8.75421	2.6936	0	0	1.0101	0	0	1.3468	13.468	4.7138	0.3367	3.7037	0	0.673401	1.3468	0	0	0
391	U1575A	3R	7W	65-67	28.48	0	0	9.60265	0	0	0	0.662252	1.65563	1.65563	0.993377	0	4.63576	0	0.331126	20.5298	16.5563	0	0	0	0	0	0.993377	1.98675	0.662252	0	0.993377	9.27152	5.62914	0	0	0	0	0	0.331126	12.9139	1.3245	0	4.96689	0.662252	0.662252	1.3245	0	0	0.662252
391	U1575A	4R	1W	0-2	28.71	0	0	9.0301	0	0	0	0.668896	0.668896	0.334448	0	0	6.68896	0	0	24.4147	14.0468	0	3.34448	0	0	0	0	2.67559	1.00334	0	0.668896	0	11.0368	0	0	2.00669	0	0	0	9.699	5.35117	0.334448	3.34448	0.334448	1.00334	0.334448	0.334448	0	0.334448
391	U1575A	4R	2W	138-140	31.6	0	0	6.45161	0	0	0	0.967742	1.29032	1.29032	0	0	4.51613	0	0	26.4516	7.74194	0	3.54839	0	0	0	0.322581	0.645161	0	0	0	0	13.5484	0	0	0.967742	0	0	1.29032	10.6452	5.80645	0	12.2581	0	0.322581	0	0	0	0
					average	0	0	7.48224	0.154478	0	0.0414079	0.820521	2.8281	0.556875	0.272171	0	4.83803	0.0138026	0.180537	25.7983	13.1423	0.0139353	0.453109	0.0546042	0.666803	0	4.87749	1.73435	0.501928	0.0988009	0.305181	3.84001	5.71679	0	0.0142552	1.13819	0	0	0.879863	13.0308	3.05629	0.0716405	3.39269	0.129113	0.914793	1.11805	0.0993009	0	0.693139
					st.dev	0	0	1.90656	0.336961	0	0.198585	0.728376	1.24041	0.603037	0.42949	0	1.84614	0.0661951	0.404571	9.16978	5.78282	0.0668315	1.15384	0.204392	1.16523	0	6.55662	2.86343	0.388452	0.226737	0.536515	3.57863	4.4281	0	0.0683654	0.541873	0	0	0.947553	3.50063	1.998	0.139027	2.57365	0.258501	1.39252	1.45547	0.247974	0	0.805561
[truncated: 4 more columns]

## Sheet: clusters
	Site/Hole	Core	Section	Interval	Average depth (mbsf)	Beella digitata	Dentigloborotalia anfracta	Globigerina bulloides	Globigerina falconensis	Globigerinella adamsi	Globigerinella calida	Globigerinella siphonifera	Globigerinita glutinata	Globigerinita uvula	Globigerinoides conglobatus	Globigerinoides obliquus	Globigerinoides ruber (white)	Globigerinoides ruber (pink)	Globigerinoides tenellus	Globoconella inflata	Globorotalia crassaformis	Globorotalia cf. crassaformis	Globorotalia eastropacia	Globorotalia flexuosa	Globorotalia hessi	Globorotalia hirsuta	Globorotalia menardii	Globorotalia ronda	Globorotalia scitula	Globorotalia viola	Globorotalia tosaensis	Globorotalia truncatulinoides (dx)	Globorotalia truncatulinoides (sx)	Globorotalia tumida	Globorotalia ungulata	Globoturborotalita rubescens	Globoturborotalita spp.	Hastigerina pelagica	Neogloboquadrina dutertrei	Neogloboquadrina incompta	Neogloboquadrina pachyderma	Orbulina suturalis	Orbulina universa	Pulleniatina finalis	Pulleniatina obliquiloculata	Sphaeroidinella dehiscens	Tenuitellita iota	Tenuitellita parkerae	Trilobatus spp.
	U1575A	1R	1W	0-2	0.01	0	0	9.20635	0.634921	0	0.952381	0.952381	4.44444	0.31746	0.31746	0	2.85714	0.31746	0	16.1905	5.07937	0	0	0	0	0	14.6032	0	0.952381	0	0	9.20635	4.7619	0	0	1.5873	0	0	0.952381	12.6984	0.952381	0.31746	7.61905	0.31746	0	0.634921	0	0	3.49206
	U1575A	1R	1W	140-142	1.41	0	0	6.875	0.625	0	0	1.25	4.0625	0	0	0	4.0625	0	0	18.4375	3.4375	0	0	0.3125	0	0	23.4375	0	0.625	0	0	5.625	7.8125	0	0	1.875	0	0	1.875	7.5	4.6875	0	5.9375	0	0	0.625	0	0	0.625
	U1575A	1R	2W	0-2	1.52	0	0	6.28931	0.314465	0	0	1.25786	1.57233	0.314465	0.314465	0	4.71698	0	0.943396	22.956	3.45912	0	0	0.943396	0.628931	0	21.6981	0	0.314465	0	0	8.49057	1.25786	0	0	1.57233	0	0	2.20126	7.2327	8.80503	0	1.88679	0.314465	0.628931	0	0	0	0.943396
	U1575A	1R	3W	138-140	4.41	0	0	3.97554	0	0	0	0.30581	3.36391	0.30581	0.30581	0	2.14067	0	1.22324	18.9602	18.3486	0	0	0	1.22324	0	2.14067	0	0.611621	0.611621	0	2.75229	13.4557	0	0	1.83486	0	0	0.611621	21.1009	0.917431	0	2.75229	0	0	1.52905	0	0	0.30581
	U1575A	1R	4W	10-12	4.64	0	0	6.73077	0	0	0	0.320513	2.88462	0.641026	0.320513	0	1.92308	0	0	23.7179	18.5897	0.320513	0	0	0.320513	0	2.88462	0	0.641026	0.641026	0	3.20513	12.8205	0	0	0.320513	0	0	0.641026	16.3462	2.24359	0	2.5641	0	0.320513	0.641026	0.961538	0	0
	U1575A	1R	5W	0-2	6.04	0	0	8.46906	1.30293	0	0	0.325733	3.58306	0.651466	1.62866	0	4.23453	0	0	22.4756	18.5668	0	0	0	2.9316	0	1.30293	0	0	0	0	3.58306	4.23453	0	0	1.30293	0	0	4.23453	11.7264	3.25733	0	4.23453	0	0	1.9544	0	0	0
	U1575A	1R	6W	0-2	7.55	0	0	3.37838	0.675676	0	0	0.675676	5.06757	0.675676	0.337838	0	3.37838	0	0	44.5946	9.45946	0	0	0	1.01351	0	1.01351	0	1.01351	0	0	4.05405	1.68919	0	0	1.68919	0	0	1.01351	12.1622	4.05405	0	1.68919	0	0	1.35135	0	0	1.01351
	U1575A	1R	7W	69-71	9.24	0	0	6.93069	0	0	0	1.9802	2.64026	0	0	0	5.28053	0	0	18.1518	15.8416	0	0	0	0.330033	0	4.29043	0	0	0	0	9.57096	1.32013	0	0	1.32013	0	0	0.990099	15.5116	3.9604	0	2.64026	0	0	6.93069	0	0	1.65017
	U1575A	2R	1W	0-2	9.51	0	0	6.16883	0	0	0	0	2.5974	0	0	0	6.81818	0	0	19.4805	27.2727	0	0	0	0	0	5.84416	0	0.649351	0	0	7.46753	1.94805	0	0	0.974026	0	0	0	13.3117	2.5974	0.324675	2.27273	0	1.2987	0.974026	0	0	0
	U1575A	2R	2W	143-145	12.44	0	0	8.25083	0	0	0	2.64026	2.31023	1.32013	0	0	8.58086	0	1.32013	11.8812	13.2013	0	0	0	1.32013	0	0.330033	10.8911	0.990099	0	2.31023	1.65017	7.92079	0	0	0.990099	0	0	0	11.8812	1.9802	0	1.32013	0	4.62046	0.990099	0.660066	0	1.32013
	U1575A	2R	3W	0-2	12.52	0	0	8.69565	0	0	0	1.00334	4.68227	0.334448	0	0	6.35452	0	0.334448	13.7124	15.3846	0	0	0	0	0	0.334448	8.02676	0	0.668896	1.00334	1.67224	12.709	0	0	1.67224	0	0	0.334448	11.3712	1.33779	0	2.00669	0	5.35117	1.00334	0	0	1.00334
	U1575A	2R	4W	0-2	14.03	0	0	7.59076	0	0	0	0	1.9802	0	0	0	5.61056	0	0	26.0726	14.8515	0	0	0	2.31023	0	3.63036	0.660066	0.330033	0	0	0.660066	6.93069	0	0	0.330033	0	0	0.330033	15.8416	1.9802	0	5.61056	0.990099	0.990099	0	0	0	0.990099
	U1575A	2R	5W	0-2	15.54	0	0	11.8033	0	0	0	0	1.63934	0	0	0	2.95082	0	0	37.0492	6.88525	0	0	0	0	0	7.21311	1.31148	0.327869	0	0	0	0.983607	0	0	0.327869	0	0	0.983607	19.3443	2.95082	0	1.63934	0	1.31148	1.63934	0.327869	0	1.31148
	U1575A	2R	7W	64-66	18.99	0	0	7.01754	0	0	0	0.701754	4.21053	0	0.701754	0	7.01754	0	0	30.8772	17.193	0	0	0	4.5614	0	0.701754	0.701754	1.05263	0.350877	0.350877	0	3.50877	0	0	1.05263	0	0	1.40351	11.2281	0.701754	0	1.05263	0.350877	1.40351	2.80702	0	0	0
	U1575A	3R	1W	0-2	19.01	0	0	9.40767	0	0	0	0.696864	2.43902	0	0	0	3.48432	0	0	34.8432	11.8467	0	0.348432	0	0.696864	0	4.52962	0.348432	0	0	0.348432	0	3.13589	0	0	1.0453	0	0	0.696864	16.3763	3.83275	0	2.43902	0	1.39373	0	0	0	0.348432
	U1575A	3R	2W	0-2	20.51	0	0	8.12721	0	0	0	2.4735	2.12014	0	0	0	4.947	0	0	29.3286	17.6678	0	3.18021	0	0	0	0	0	0.706714	0	0.353357	0.353357	8.12721	0	0	0.706714	0	0	0.353357	10.6007	4.24028	0	3.18021	0	1.06007	0	0	0	0
	U1575A	3R	3W	145-147	23.45	0	0	9.0301	0	0	0	0.668896	1.33779	2.00669	1.00334	0	8.3612	0	0	26.7559	14.0468	0	0	0	0	0	9.0301	5.68562	0.334448	0	0.334448	0.334448	4.34783	0	0	1.00334	0	0	0	9.0301	1.33779	0.334448	2.34114	0	0	0.334448	0	0	0
	U1575A	3R	4W	138-140	24.89	0	0	6.07029	0	0	0	0	2.8754	0.638978	0	0	5.43131	0	0	38.0192	13.099	0	0	0	0	0	2.8754	0.958466	0.319489	0	0.319489	5.11182	0.958466	0	0	1.27796	0	0	0.319489	16.9329	0.638978	0	1.91693	0	0	0.638978	0	0	0.958466
	U1575A	3R	5W	0-2	25.02	0	0	5.2459	0	0	0	0.983607	4.59016	1.31148	0	0	4.59016	0	0	45.9016	6.22951	0	0	0	0	0	1.63934	2.29508	0	0	0	6.55738	0.655738	0	0.327869	1.31148	0	0	0.327869	12.7869	2.62295	0	0.655738	0	0	0.655738	0	0	0.983607
	U1575A	3R	6W	120-122	27.72	0	0	7.74411	0	0	0	0.3367	3.0303	1.0101	0.3367	0	2.6936	0	0	22.5589	13.468	0	0	0	0	0	3.367	3.7037	1.0101	0	0.3367	8.75421	2.6936	0	0	1.0101	0	0	1.3468	13.468	4.7138	0.3367	3.7037	0	0.673401	1.3468	0	0	0
	U1575A	3R	7W	65-67	28.48	0	0	9.60265	0	0	0	0.662252	1.65563	1.65563	0.993377	0	4.63576	0	0.331126	20.5298	16.5563	0	0	0	0	0	0.993377	1.98675	0.662252	0	0.993377	9.27152	5.62914	0	0	0	0	0	0.331126	12.9139	1.3245	0	4.96689	0.662252	0.662252	1.3245	0	0	0.662252
	U1575A	4R	1W	0-2	28.71	0	0	9.0301	0	0	0	0.668896	0.668896	0.334448	0	0	6.68896	0	0	24.4147	14.0468	0	3.34448	0	0	0	0	2.67559	1.00334	0	0.668896	0	11.0368	0	0	2.00669	0	0	0	9.699	5.35117	0.334448	3.34448	0.334448	1.00334	0.334448	0.334448	0	0.334448
	U1575A	4R	2W	138-140	31.6	0	0	6.45161	0	0	0	0.967742	1.29032	1.29032	0	0	4.51613	0	0	26.4516	7.74194	0	3.54839	0	0	0	0.322581	0.645161	0	0	0	0	13.5484	0	0	0.967742	0	0	1.29032	10.6452	5.80645	0	12.2581	0	0.322581	0	0	0	0
					3	0	0	7.45689	0.524795	0	0.31746	1.15341	3.35976	0.210642	0.210642	0	3.87887	0.10582	0.314465	19.1947	3.99199	0	0	0.418632	0.209644	0	19.9129	0	0.630615	0	0	7.77397	4.61076	0	0	1.67821	0	0	1.67621	9.14371	4.81497	0.10582	5.14778	0.210642	0.209644	0.419974	0	0	1.68682
				average	1b	0	0	8.02423	0	0	0	1.14055	2.32505	0.660755	0.213137	0	6.5096	0	0.206823	23.6868	14.2667	0	1.25914	0	1.02397	0	1.79366	3.66075	0.552159	0.127472	0.627644	0.583785	8.51619	0	0	1.09119	0	0	0.463959	11.2871	2.84196	0.083612	3.88924	0.209428	1.8439	0.68367	0.124314	0	0.456003
					1a	0	0	7.08881	0.186133	0	0	0.561601	2.82217	0.609147	0.512152	0	3.96091	0	0.222052	20.8393	18.3777	0.0457875	0	0	0.686483	0	2.97474	0.812923	0.510621	0.178949	0.190011	6.3721	6.01452	0	0	0.966081	0	0	1.16503	14.9112	2.71635	0.0944822	3.30493	0.0946074	0.422124	2.10007	0.137363	0	0.374032
					2	0	0	7.1811	0.135135	0	0	0.471229	3.3223	0.525226	0.0675676	0	3.967	0	0	40.0816	9.50399	0	0.0696864	0	0.342076	0	3.4542	0.982691	0.332174	0	0.133584	3.14465	1.48458	0	0.0655738	1.13036	0	0	0.668268	15.5205	2.81991	0	1.66805	0	0.541041	0.857082	0.0655738	0	0.923099
					3	0	0	1.54312	0.182219	0	0.549857	0.174144	1.5597	0.182427	0.182427	0	0.943418	0.183286	0.54467	3.44571	0.941752	0	0	0.48057	0.363113	0	4.6799	0	0.318995	0	0	1.89516	3.27993	0	0	0.17059	0	0	0.647735	3.08137	3.92788	0.183286	2.9466	0.182427	0.363113	0.363742	0	0	1.57147
				stdev	1b	0	0	0.941939	0	0	0	0.926814	1.41728	0.771401	0.402801	0	1.47632	0	0.464819	7.02728	3.05957	0	1.74057	0	1.66897	0	3.1578	4.08246	0.443399	0.250868	0.755893	0.703603	3.67861	0	0	0.526118	0	0	0.567997	2.05656	1.98676	0.154819	3.67204	0.351402	1.99887	0.952502	0.246087	0	0.557813
					1a	0	0	1.79564	0.492462	0	0	0.65418	0.627706	0.590597	0.593417	0	1.80314	0	0.458405	2.10621	4.34084	0.121142	0	0	1.08039	0	1.70992	1.47415	0.374253	0.305732	0.375818	3.06663	5.07627	0	0	0.625256	0	0	1.42121	3.14922	1.36877	0.161396	1.01215	0.250308	0.48889	2.16979	0.363427	0	0.615879
					2	0	0	3.38237	0.302171	0	0	0.447033	1.45479	0.548973	0.151086	0	1.01792	0	0	4.87673	2.99978	0	0.155824	0	0.481599	0	2.49357	0.894291	0.413848	0	0.183204	3.00504	0.997927	0	0.146627	0.504506	0	0	0.337997	3.00414	1.35659	0	0.648535	0	0.741421	0.647869	0.146627	0	0.351484
[truncated: 3 more columns]

[truncated: 1 more sheets: clusters_2]
